# Supplementary material
Source: PubMed Central journal article supplement (PMC3981083)
Supplement: embor2013158s1.pdf [file embor2013158s1.pdf]

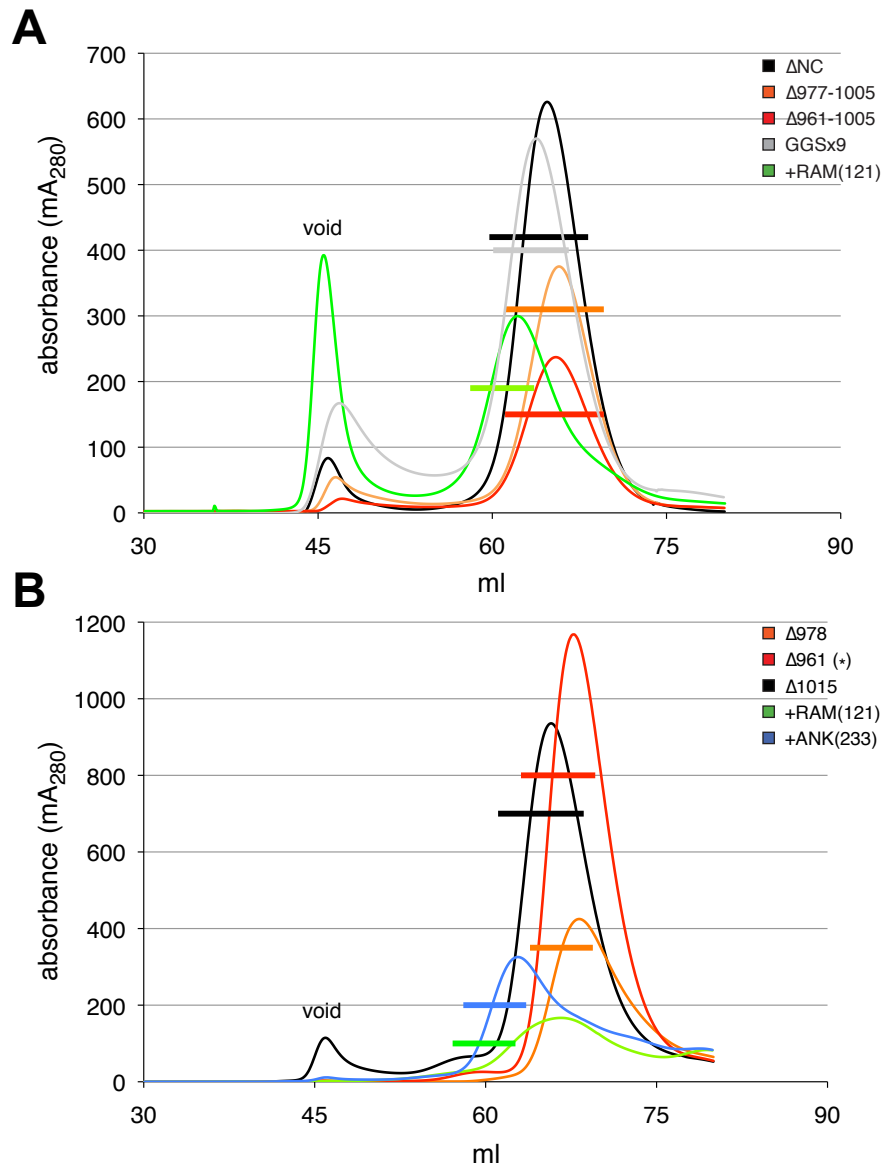

### Supplementary Figure 1.

Purification of Chd1 variants by size exclusion chromatography. Shown are elution profiles for Chd1 variants with the native DBD (**A**) or the AraC DBD (**B**). The portions of each peak selected for the final pool are represented by thick horizontal bars. These fractions tended to be on the leading edge of the peak to eliminate smaller contaminating proteins. Final purity for each protein pool is shown in Fig. 1C,D.
